# Supplementary material for: Ion-induced cycle opening of a diarylethene and its application on visual detection of Cu2+ and Hg2+ and keypad lock
Source: Royal Society of Chemistry journal article supplement (doi:10.1039/c4tc01215a), 2014-01-01
Supplement: c4tc01215a1.pdf [file c4tc01215a1.pdf]

Supporting information for

**Ion induced cycle opening of a diarylethene and its application on visual detection  
of Cu<sup>2+</sup> and Hg<sup>2+</sup> and keypad lock**

**Junjie He,<sup>a</sup> Jingxian He,<sup>b</sup> Tingting Wang<sup>a</sup> and Heping Zeng<sup>a\*</sup>**

*<sup>a</sup>State Key Laboratory of Luminescent Materials and Devices, School of Chemistry and Chemical Engineering, South China University of Technology, Guangzhou 510640, China. E-mail: [hpzeng@scut.edu.cn](mailto:hpzeng@scut.edu.cn)*

*<sup>b</sup>School of Physics and Technology, Yunnan University, Yunnan 650504, China. E-mail: [jingxian\\_he@sina.com](mailto:jingxian_he@sina.com)*

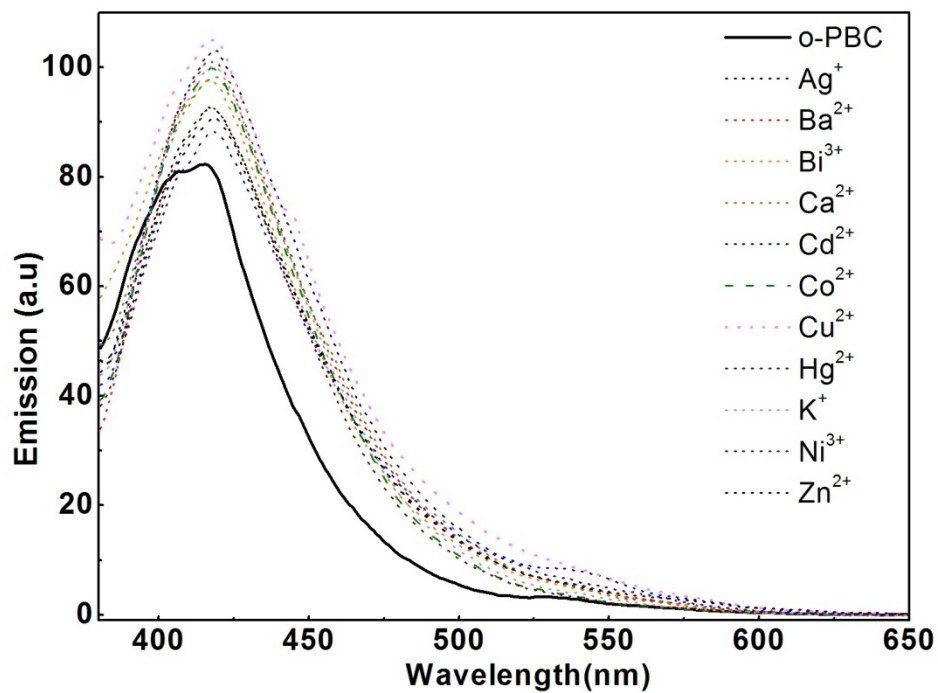

Fig. S 1 Fluorescence spectra of **o-PBC** solutions added different metal ions.

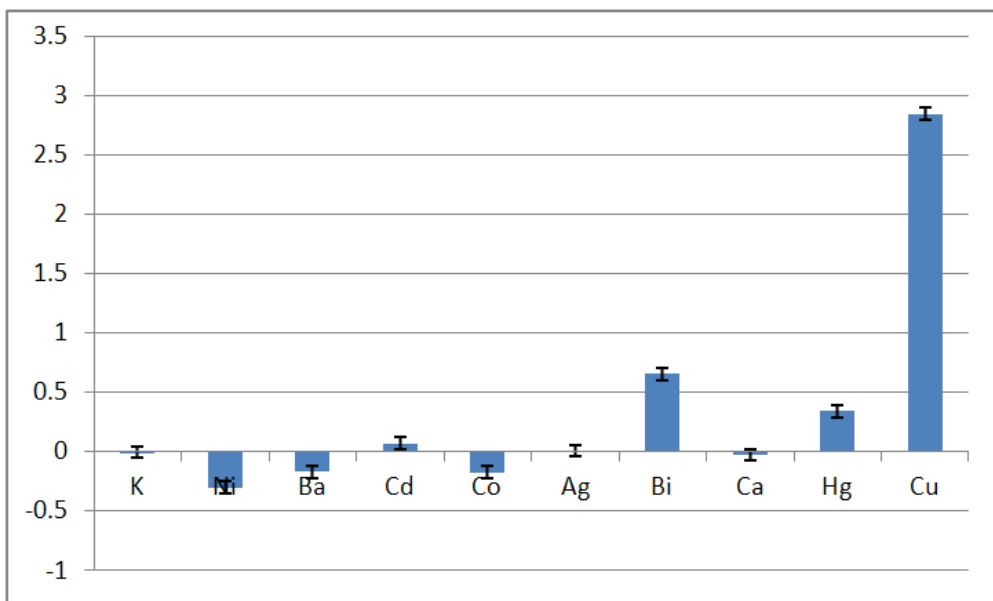

Fig. S 2 Emission intensity changes of **PBC** acetonitrile solution ( $1.0 \times 10^{-5}$  mol L<sup>-1</sup>) at 452 nm in PSS in the presence of respective metal ions (20 equiv.) at room temperature. F0: initial emission intensity of **PBC**; F: emission intensity of **PBC** in the presence of metal ions(20 equiv.).

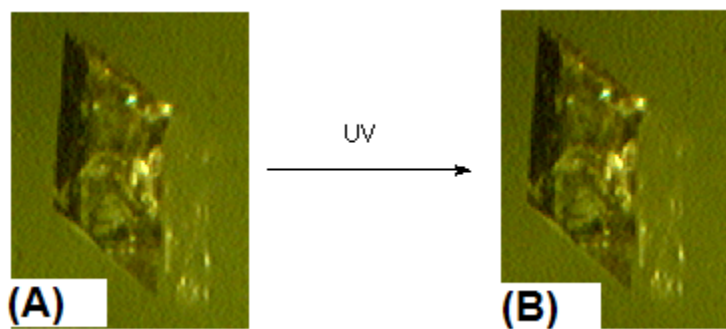

Fig. S 3 Color change of crystal **PBC** before(A) and after(B)UV light irradiation.

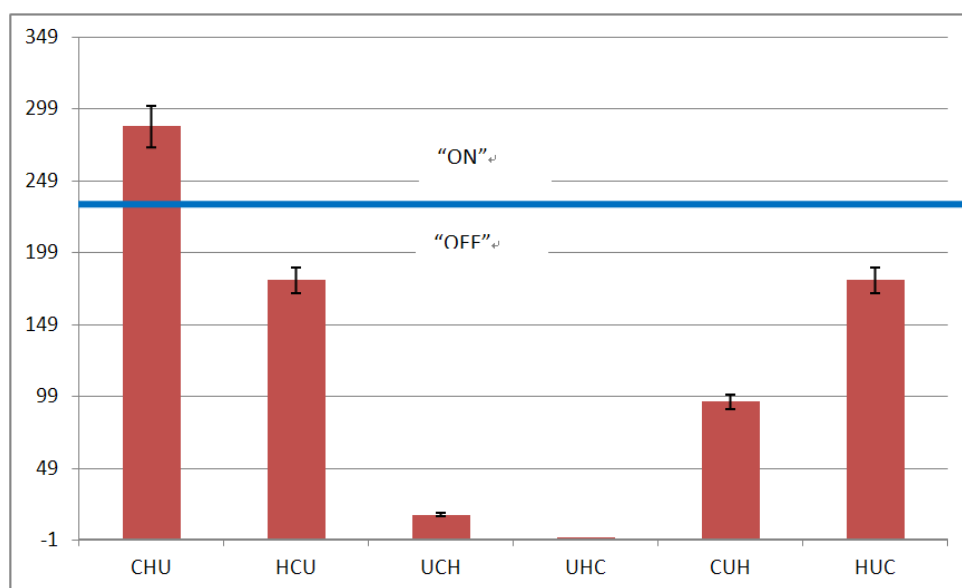

Fig. S 4 Fluorescence emission output of compound **PBC** corresponding to six possible input combinations at 480 nm

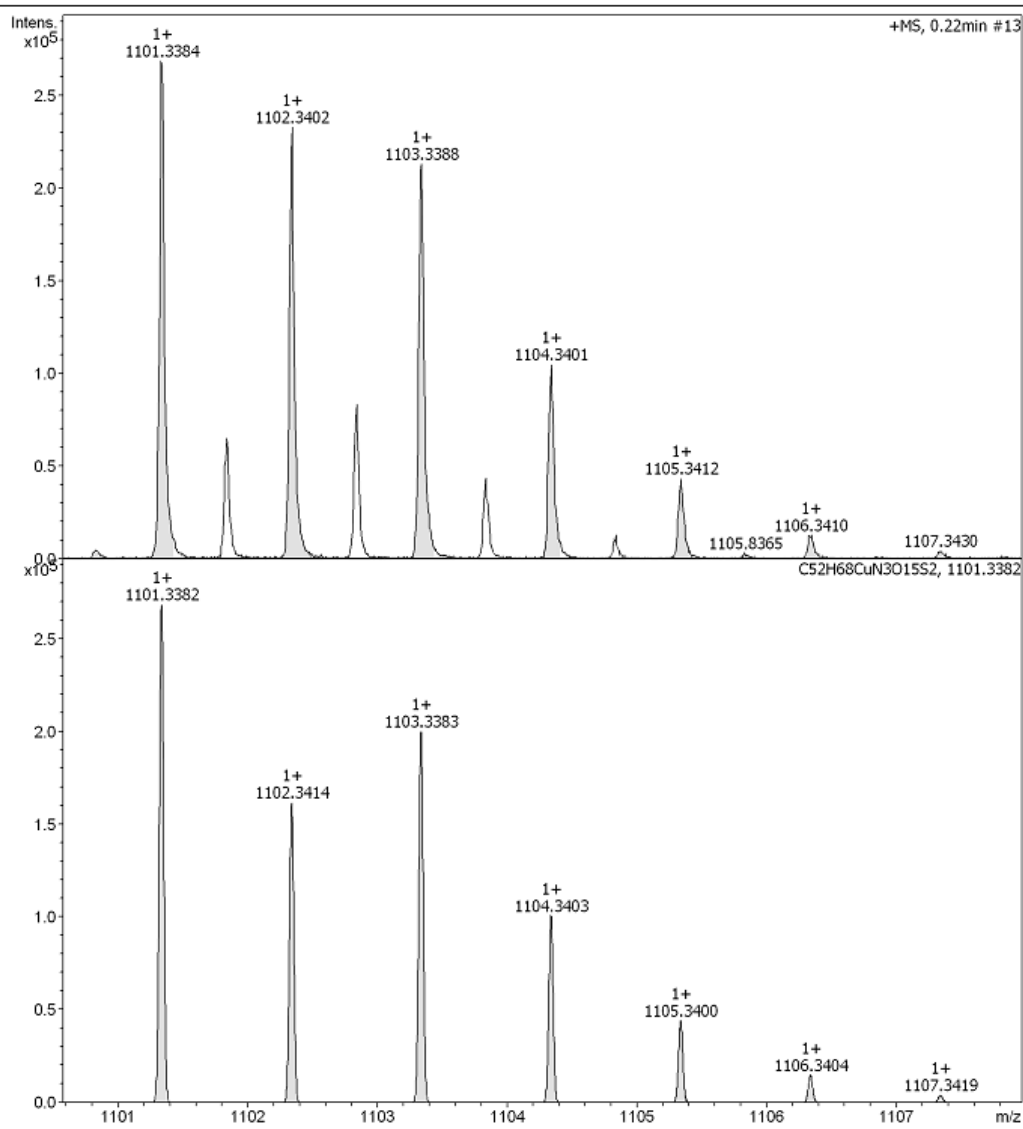

Fig. S 5 Generic display report of HRMS for **PBC-Cu-NO<sub>3</sub>**

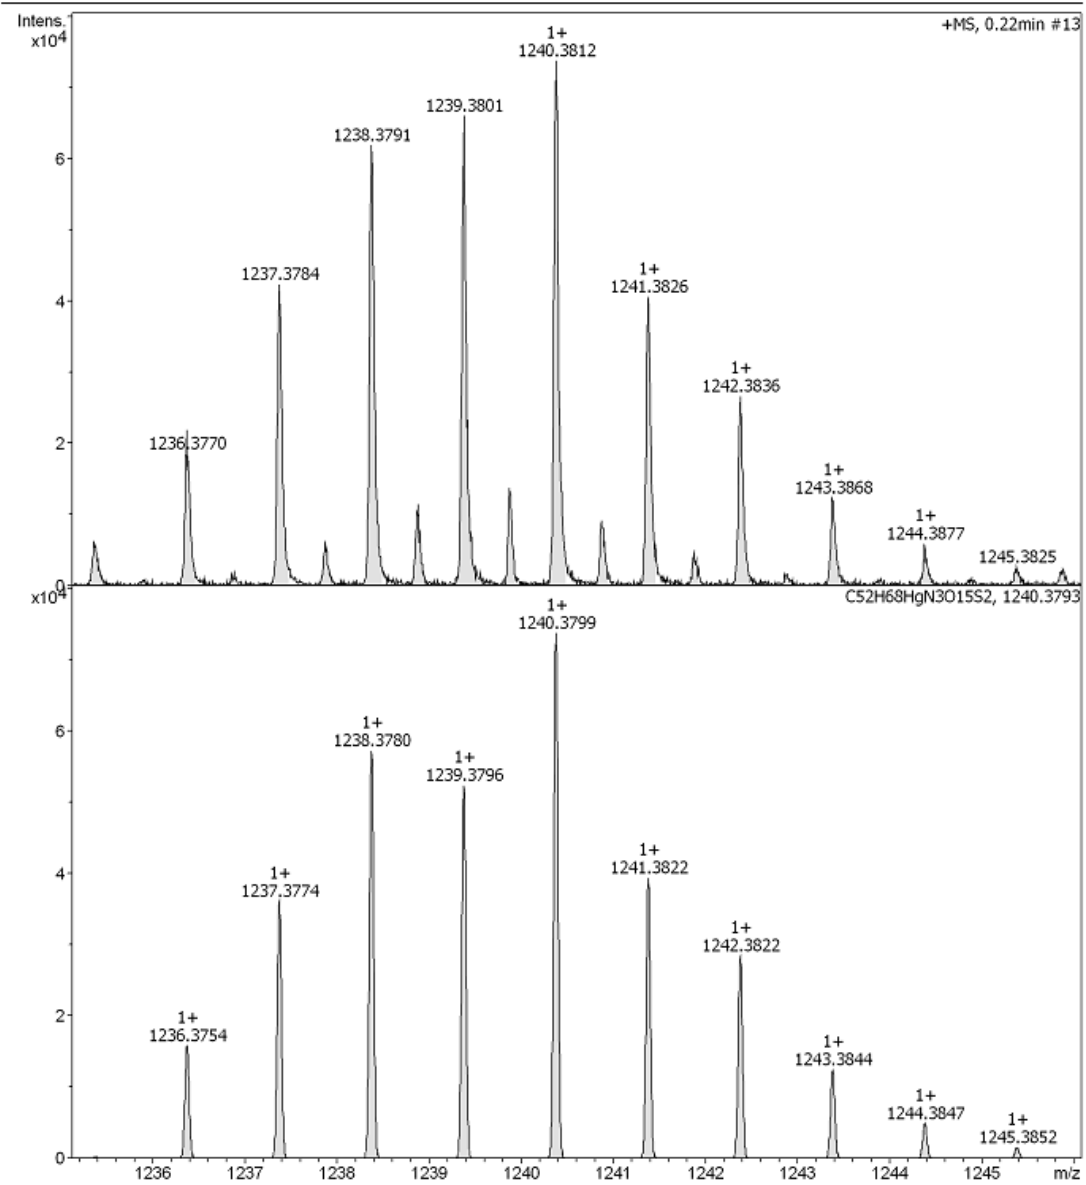

Fig. S 6 Generic display report of HRMS for **PBC-Hg-NO<sub>3</sub>**

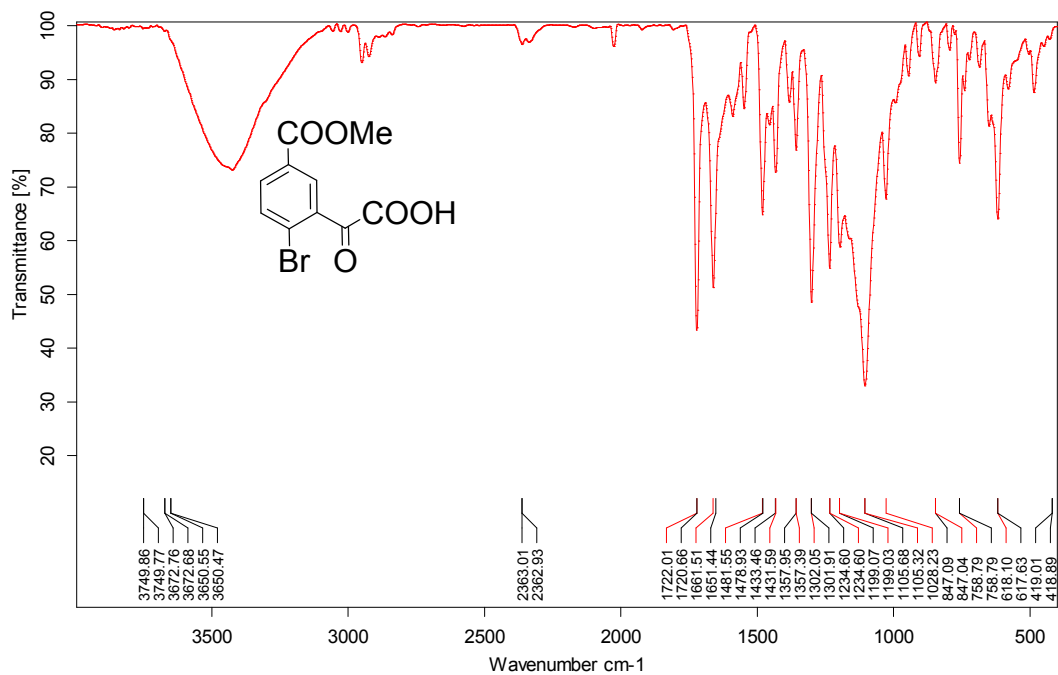

Fig. S 7 IR spectrum of 2-bromo-5-(methoxycarbonyl)benzoic acid(2)

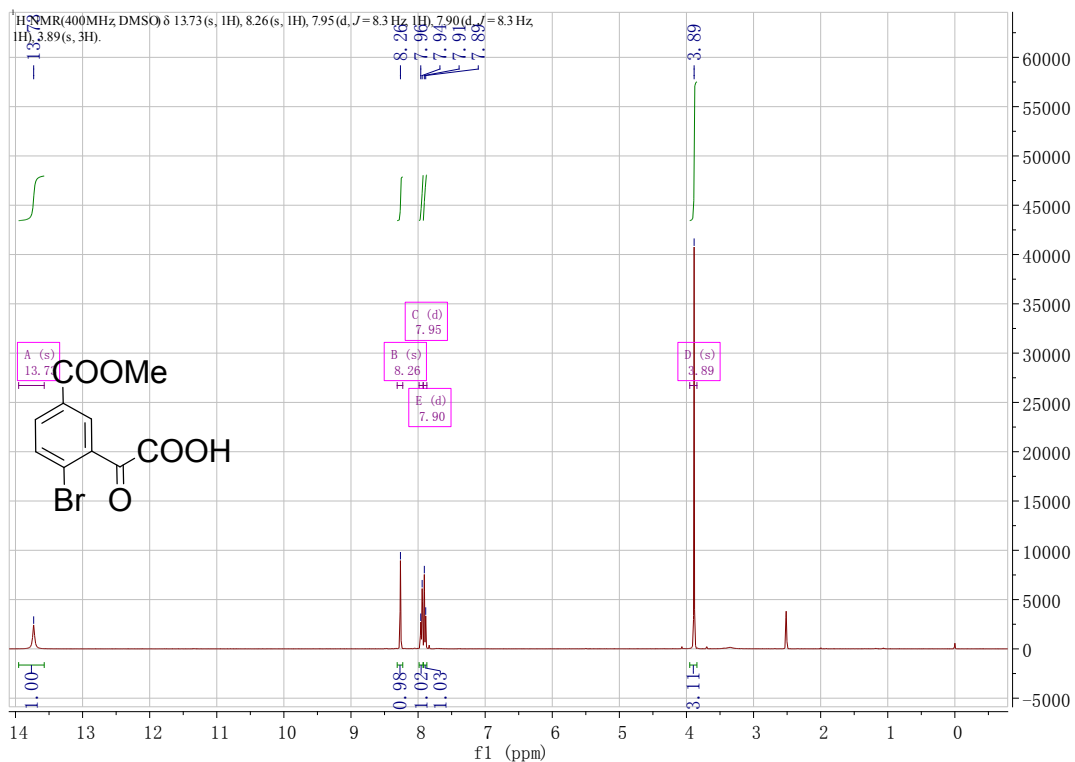

Fig. S 8  $^1\text{H}$  NMR spectrum of 2-bromo-5-(methoxycarbonyl)benzoic acid(2)

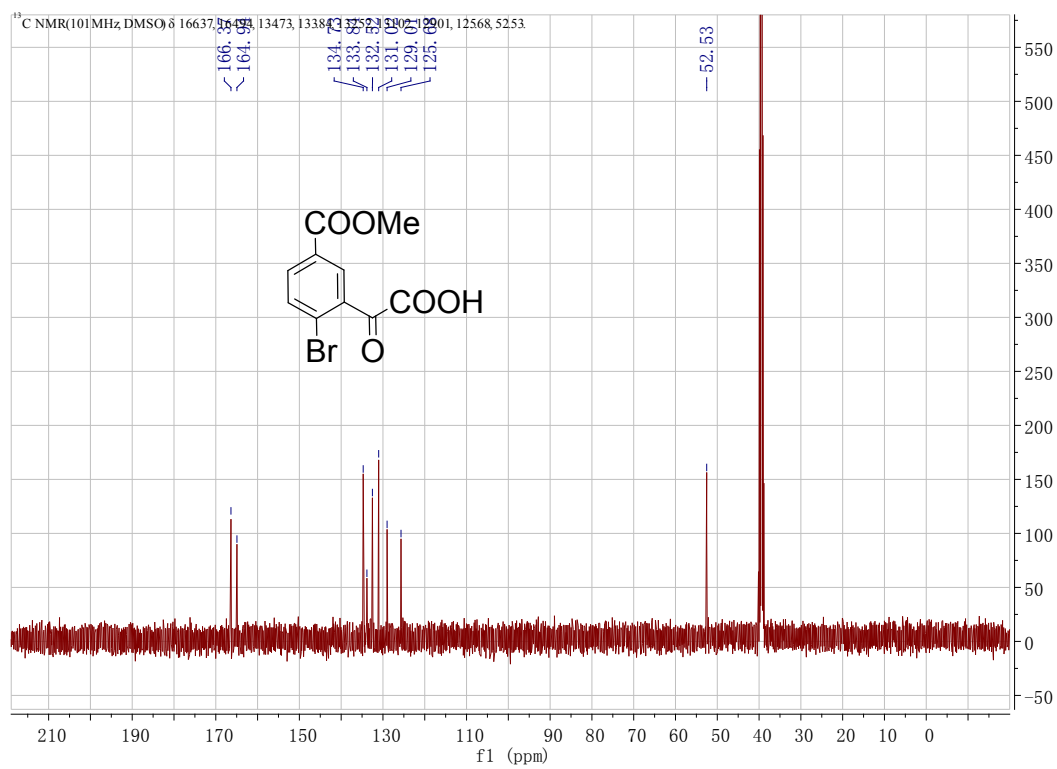

Fig. S 9  $^{13}\text{C}$  NMR spectrum of 2-bromo-5-(methoxycarbonyl)benzoic acid(2)

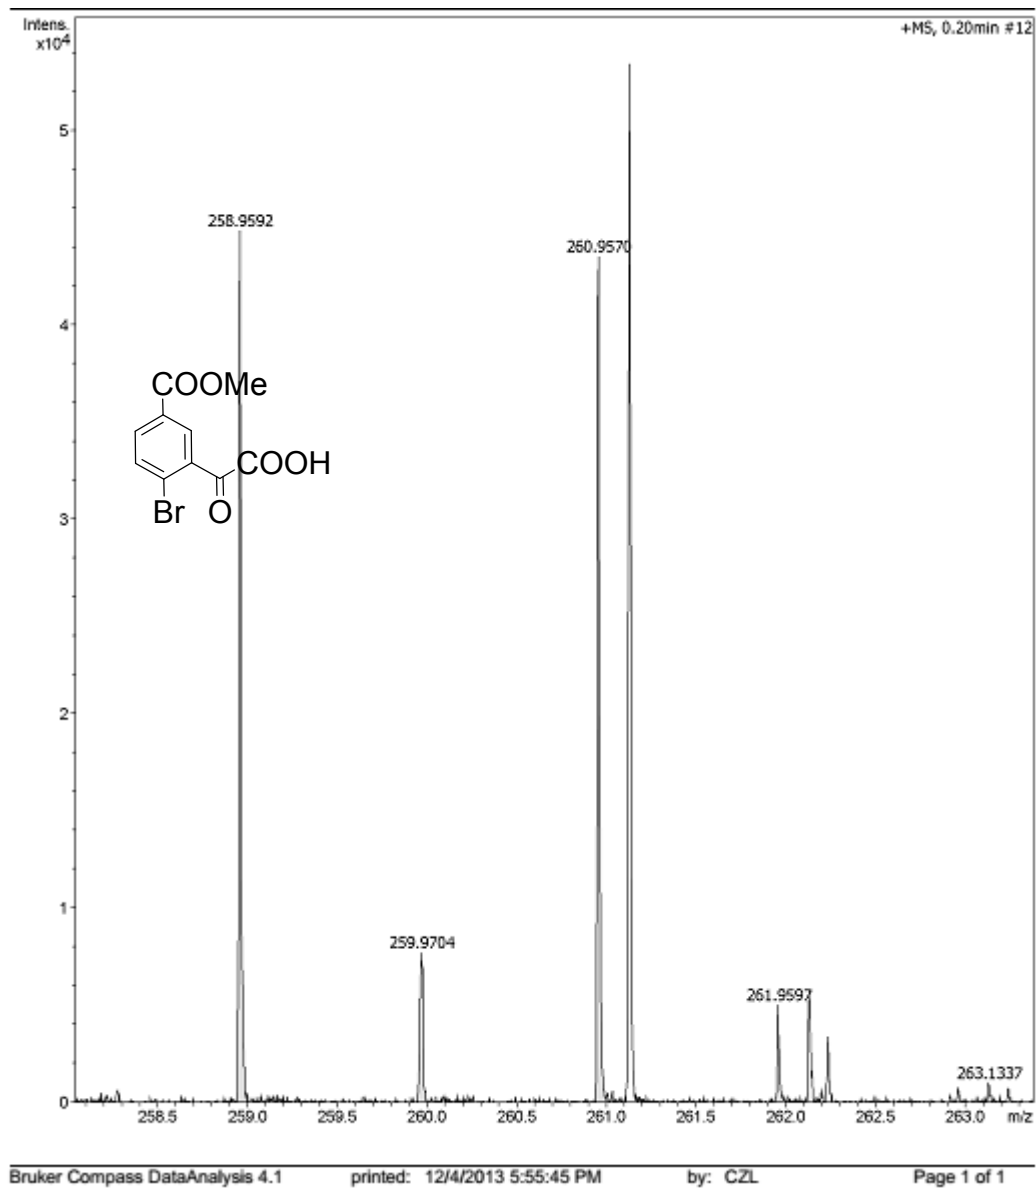

Fig. S 10 HRMS spectrum of 2-bromo-5-(methoxycarbonyl)benzoic acid(2)



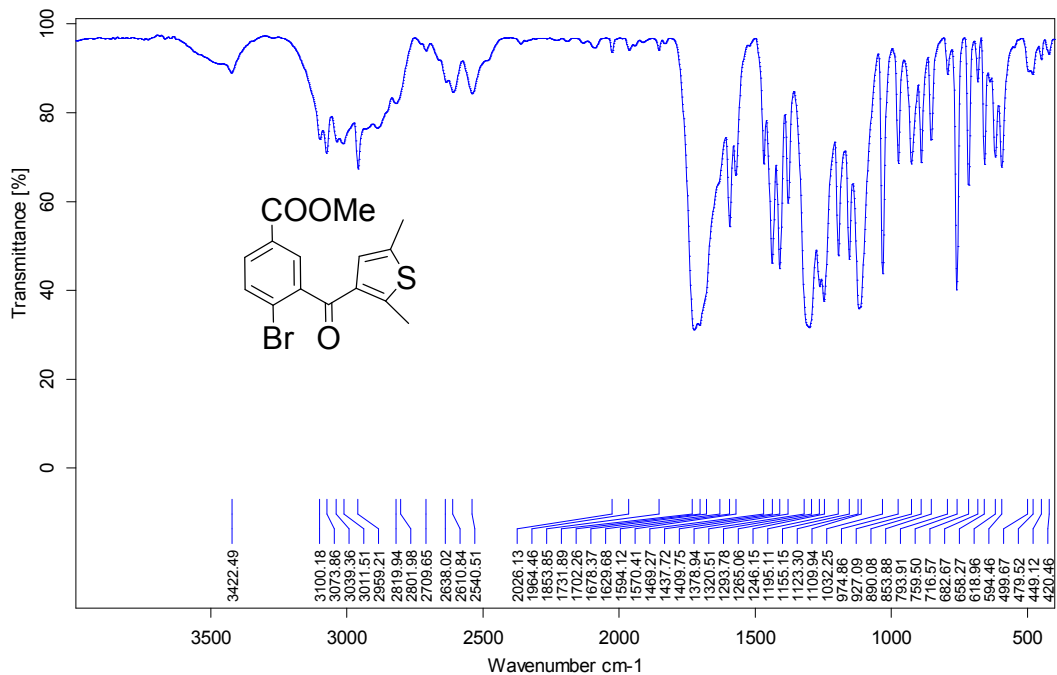

Fig. S 11 IR spectrum of methyl 4-bromo-3-(2,5-dimethylthiophene-3-carbonyl)benzoate(3)

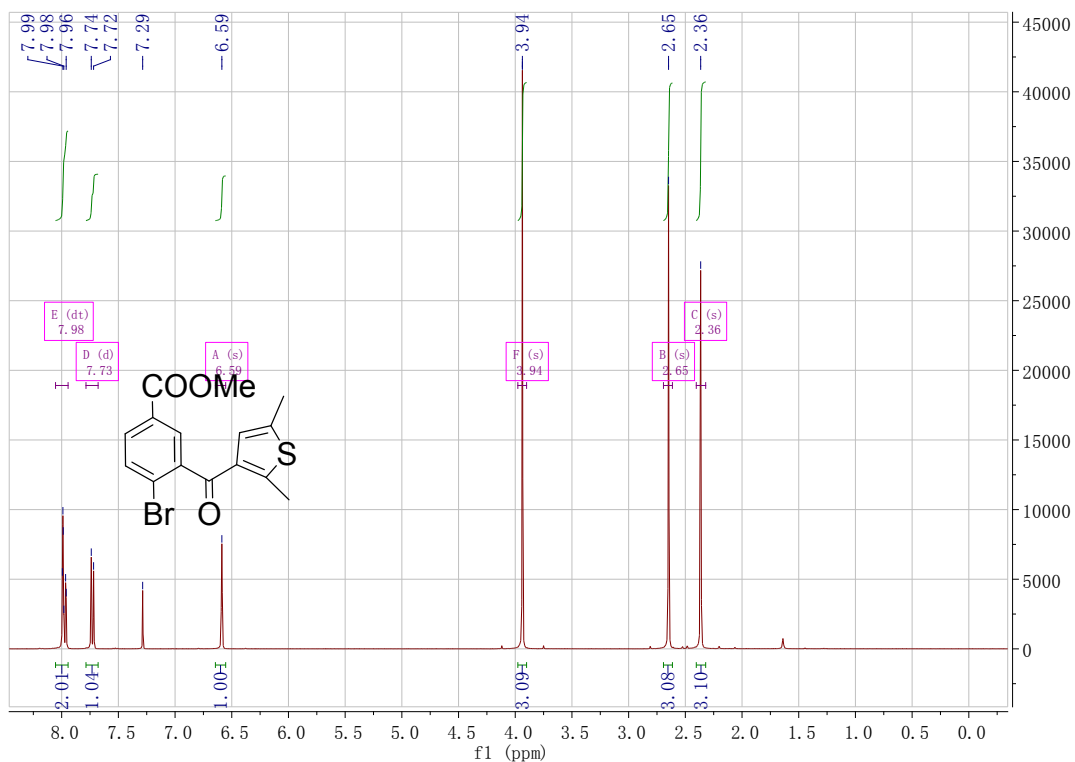

Fig. S 12 <sup>1</sup>H NMR spectrum of methyl 4-bromo-3-(2,5-dimethylthiophene-3-carbonyl)benzoate(3)

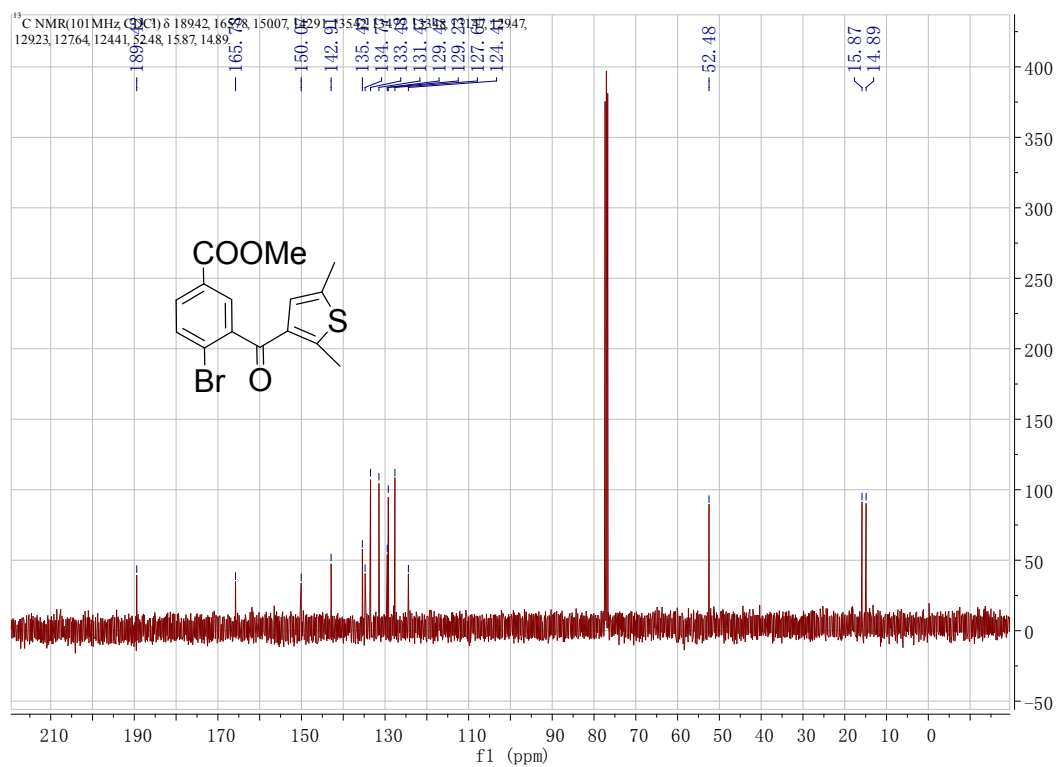

Fig. S 13  $^{13}\text{C}$  NMR spectrum of methyl 4-bromo-3-(2,5-dimethylthiophene-3-carbonyl)benzoate(3)

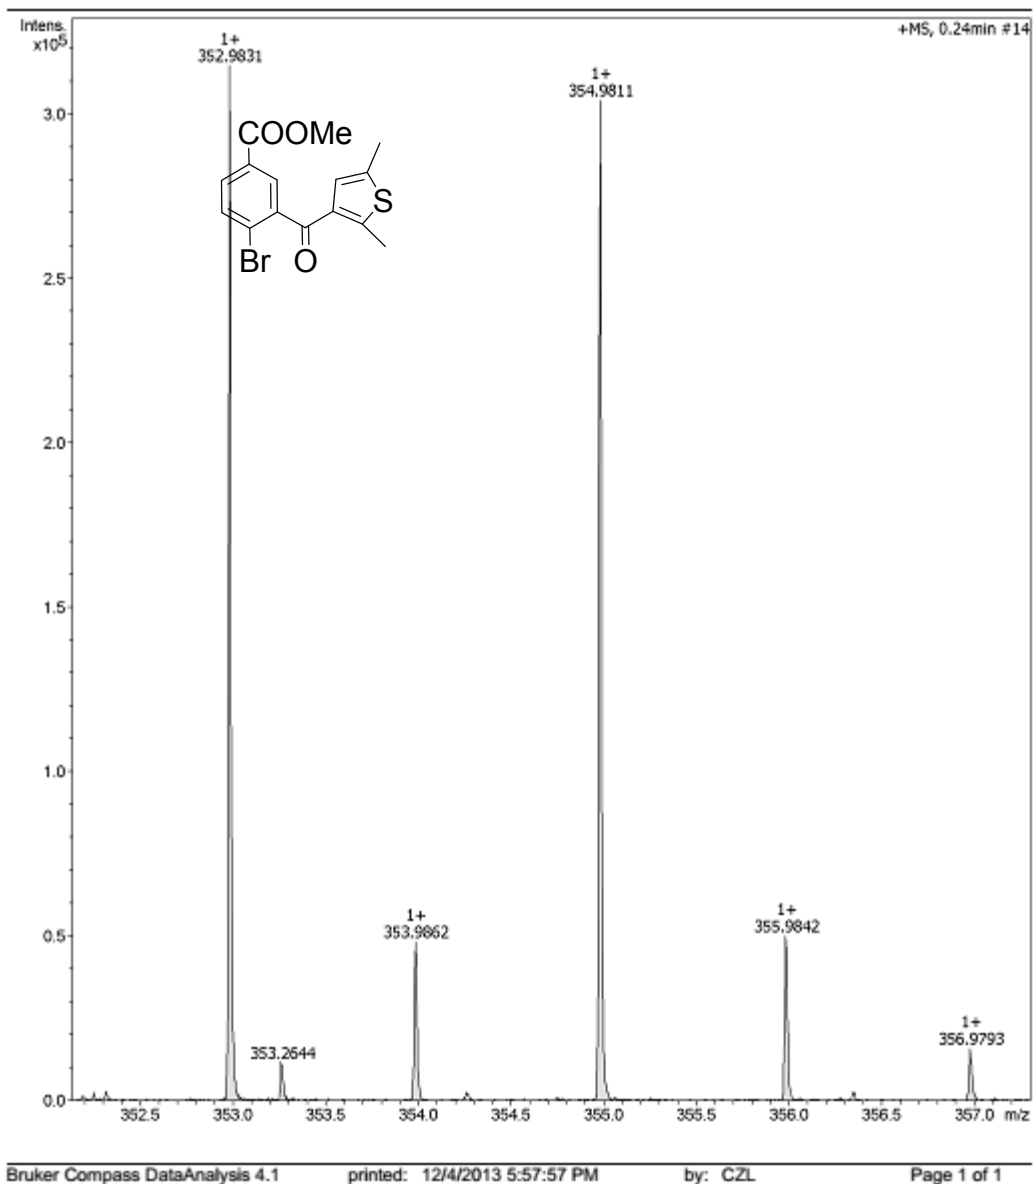

Fig. S 14 MS spectrum of methyl 4-bromo-3-(2,5-dimethylthiophene-3-carbonyl)benzoate(3)

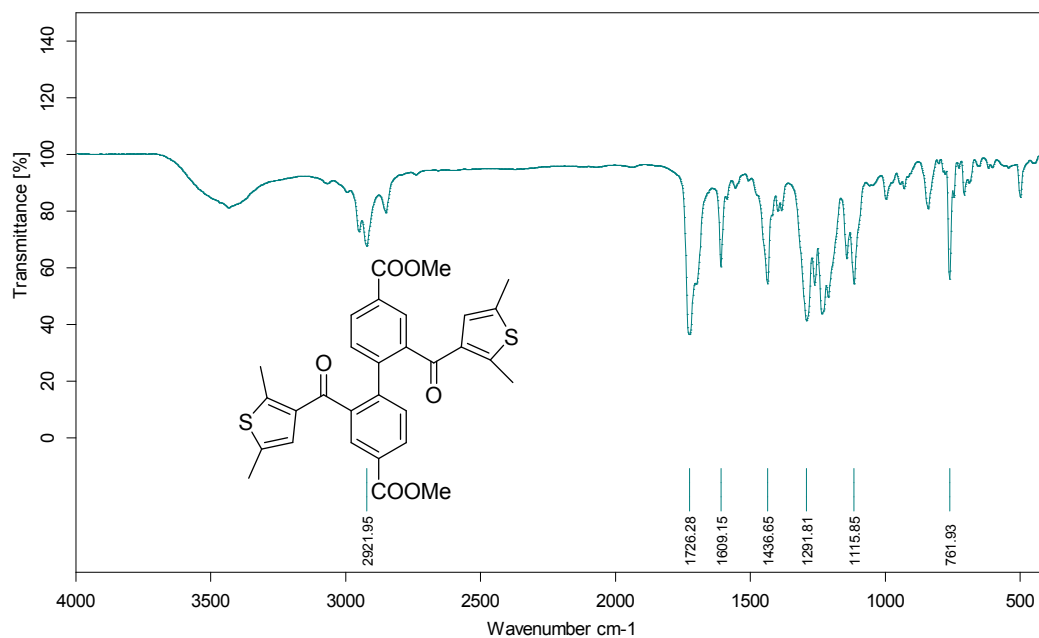

Fig. S15 IR spectrum of 2,2'-bis(2,5-dimethylthiophene-3-carbonyl) biphenyl-4,4'-dicarboxylate(4).

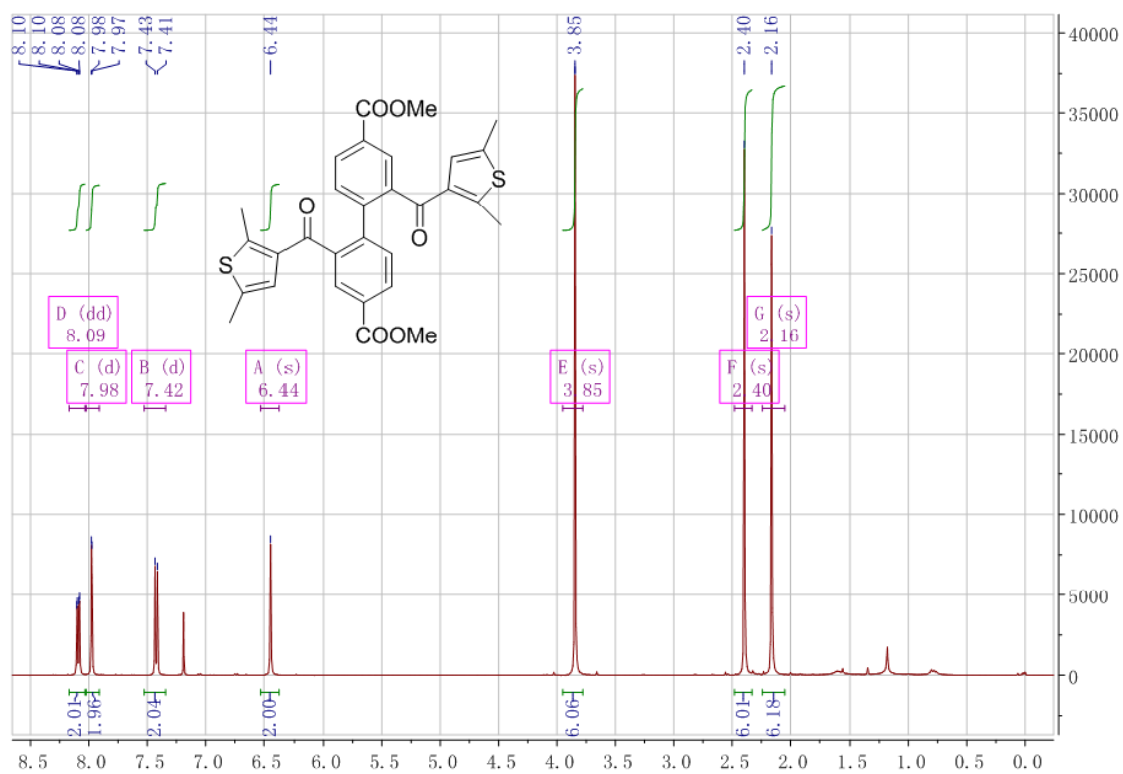

Fig. S16  $^1\text{H}$  NMR spectrum of 2,2'-bis(2,5-dimethylthiophene-3-carbonyl) biphenyl-4,4'-dicarboxylate(4).

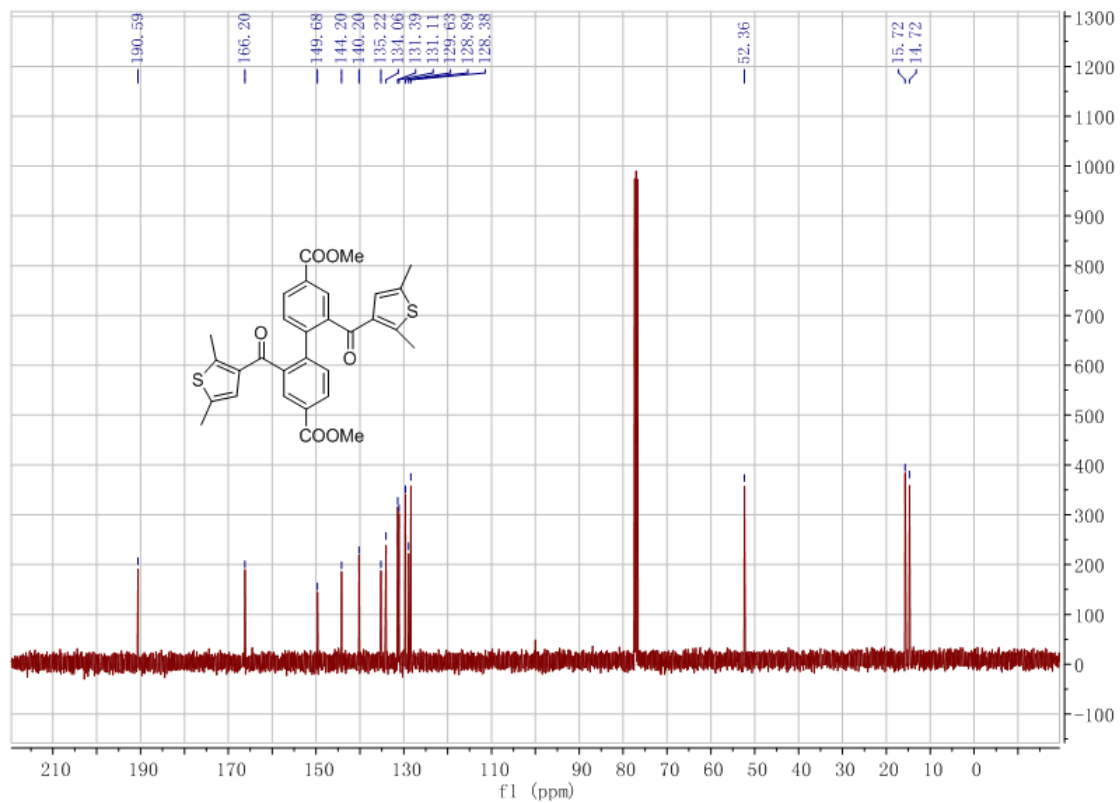

Fig. S17  $^{13}\text{C}$  NMR spectrum of 2,2'-bis(2,5-dimethylthiophene-3-carbonyl) biphenyl-4,4'-dicarboxylate(4).

# Mass Spectrum List Report

## Analysis Info

Analysis Name D:\Data\11052702-3-11-05-30.d  
 Method 110527.m  
 Sample Name d  
 Comment

Acquisition Date 5/30/2011 11:33:36 AM

Operator xxr  
 Instrument HCTplus

## Acquisition Parameter

Ion Source Type ESI Ion Polarity Positive Alternating Ion Polarity on  
 Mass Range Mode Ultra Scan Scan Begin 100 m/z Scan End 800 m/z  
 Capillary Exit 129.6 Volt Skim 1 40.0 Volt Trap Drive 57.3  
 Accumulation Time 132  $\mu$ s Averages 5 Spectra Auto MS/MS off

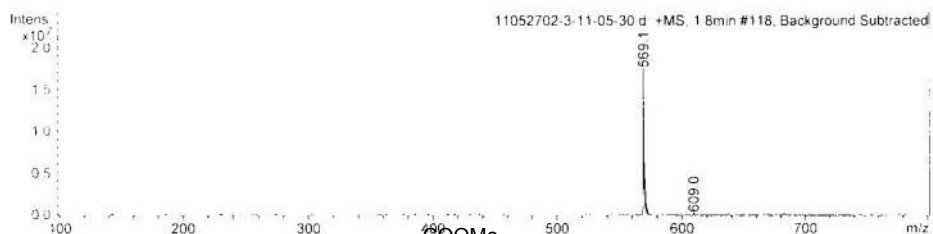

| #  | m/z   | I        | I%    |
|----|-------|----------|-------|
| 1  | 230.2 | 108197   | 0.6   |
| 2  | 569.1 | 17514922 | 100.0 |
| 3  | 569.9 | 6132173  | 35.0  |
| 4  | 571.0 | 2788805  | 15.9  |
| 5  | 572.0 | 795052   | 4.5   |
| 6  | 573.0 | 110066   | 0.6   |
| 7  | 609.0 | 249412   | 1.4   |
| 8  | 637.2 | 103954   | 0.6   |
| 9  | 669.3 | 95651    | 0.5   |
| 10 | 682.1 | 93321    | 0.5   |

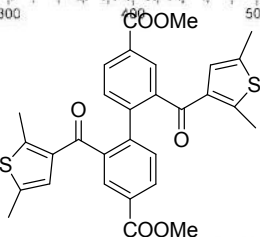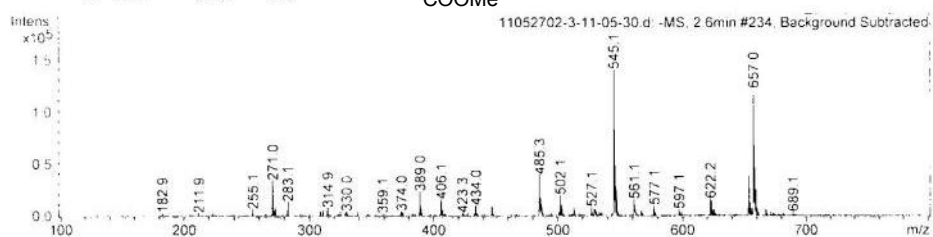

| #  | m/z   | I      | I%    |
|----|-------|--------|-------|
| 1  | 271.0 | 34188  | 24.4  |
| 2  | 389.0 | 23741  | 16.9  |
| 3  | 485.3 | 39973  | 28.5  |
| 4  | 545.1 | 140360 | 100.0 |
| 5  | 546.0 | 48134  | 34.3  |
| 6  | 547.0 | 24527  | 17.5  |
| 7  | 653.2 | 39148  | 27.9  |
| 8  | 657.0 | 122247 | 87.1  |
| 9  | 658.0 | 46341  | 33.0  |
| 10 | 659.0 | 25375  | 18.1  |

Fig. S18 Mass spectrum of 2,2'-bis(2,5-dimethylthiophene-3-carbonyl) biphenyl-4,4'-dicarboxylate(4).

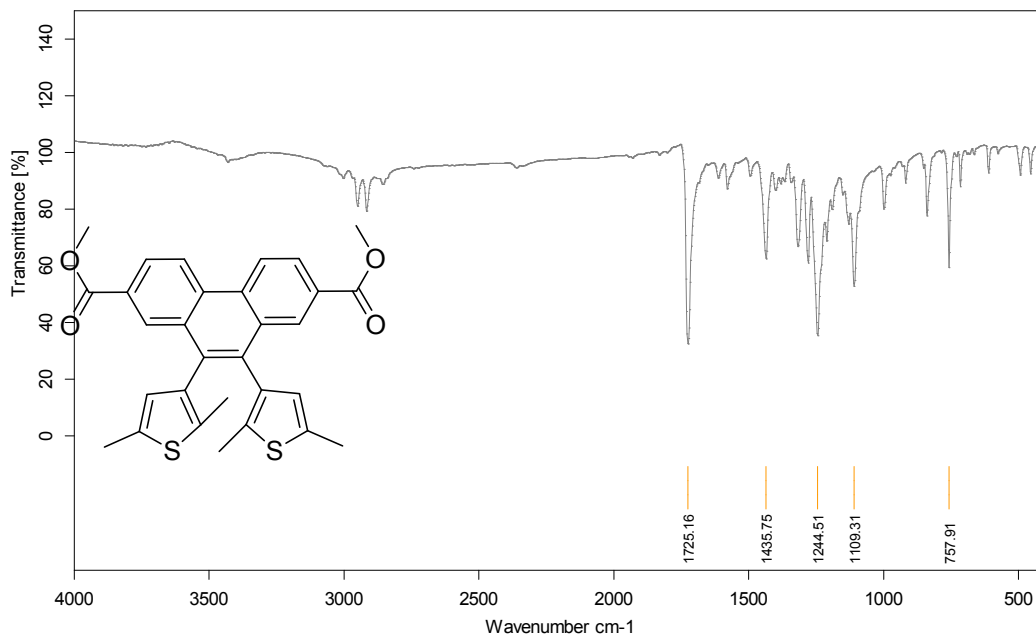

Fig. S19 IR spectrum of dimethyl 9, 10-bis(2,5-dimethylthiophen-3-yl)phenanthrene-2,7-dicarboxylate(5).

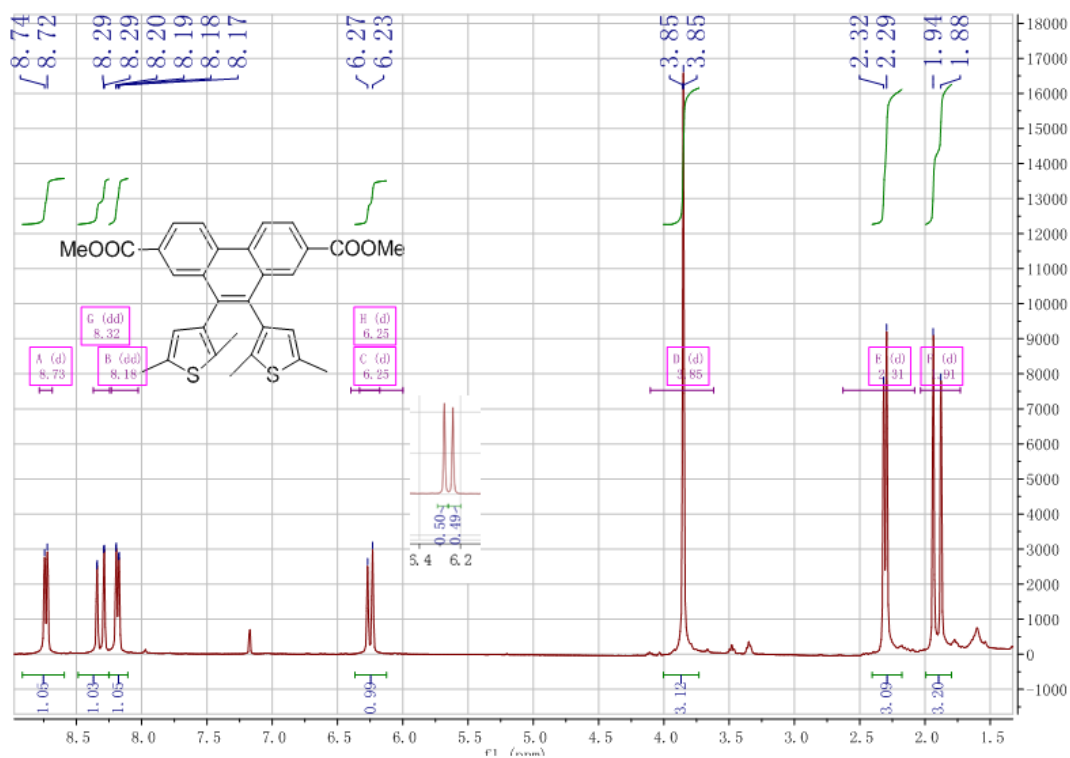

Fig. S20 <sup>1</sup>H NMR spectrum of dimethyl 9, 10-bis(2,5-dimethylthiophen-3-yl)phenanthrene-2,7-dicarboxylate(5). As the parallel and anti-parallel

form couldn't be isolated, the proton of thiophene shows two peaks at 6.2 -6.4 ppm and the integral is almost equal. It indicated that the quantity

of parallel form is equal to anti- parallel form.



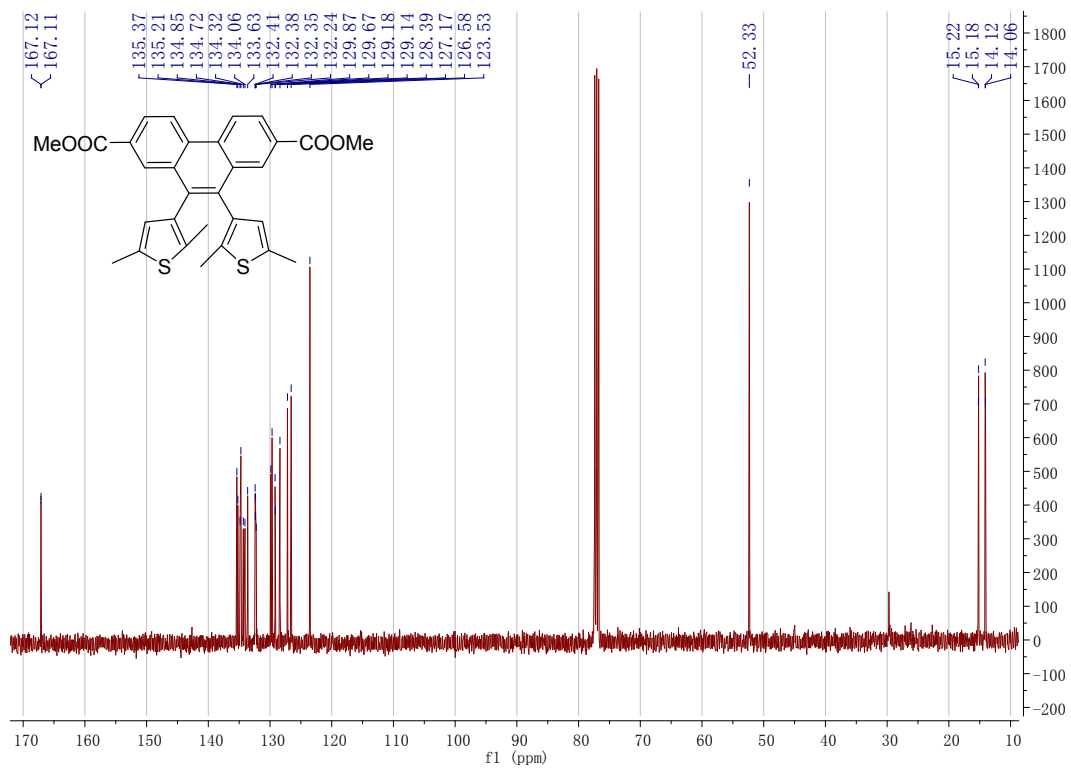

Fig. S21  $^{13}\text{C}$  NMR of dimethyl 9, 10-bis(2,5-dimethylthiophen-3-yl)phenanthrene-2,7-dicarboxylate(5).

# Mass Spectrum List Report

## Analysis Info

Analysis Name D:\Data\11091501-1-11-09-16.d  
 Method 110907-04-110916.M  
 Sample Name 514  
 Comment

Acquisition Date 9/16/2011 4:10:14 PM

Operator xxr  
 Instrument HCTplus

## Acquisition Parameter

|                   |              |              |           |                          |         |
|-------------------|--------------|--------------|-----------|--------------------------|---------|
| Ion Source Type   | APCI         | Ion Polarity | Positive  | Alternating Ion Polarity | on      |
| Mass Range Mode   | Ultra Scan   | Scan Begin   | 50 m/z    | Scan End                 | 800 m/z |
| Capillary Exit    | 121.8 Volt   | Skim 1       | 40.0 Volt | Trap Drive               | 62.7    |
| Accumulation Time | 6168 $\mu$ s | Averages     | 5 Spectra | Auto MS/MS               | off     |

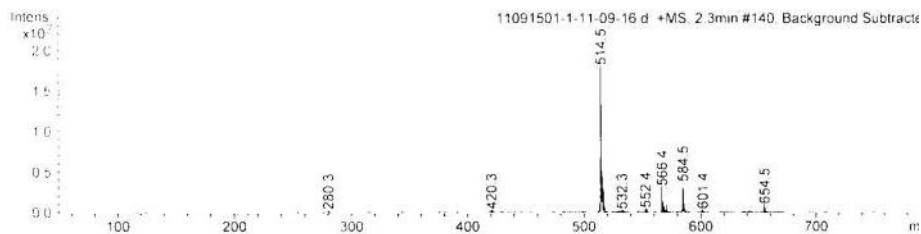

| #  | m/z   | I        | I%    |
|----|-------|----------|-------|
| 1  | 513.4 | 1044814  | 5.8   |
| 2  | 514.5 | 18120532 | 100.0 |
| 3  | 515.4 | 5062228  | 27.9  |
| 4  | 516.4 | 2892374  | 16.0  |
| 5  | 566.4 | 3214742  | 17.7  |
| 6  | 567.4 | 1207509  | 6.7   |
| 7  | 570.3 | 962097   | 5.3   |
| 8  | 584.5 | 3756736  | 20.7  |
| 9  | 585.5 | 1068531  | 5.9   |
| 10 | 654.5 | 1016406  | 5.6   |

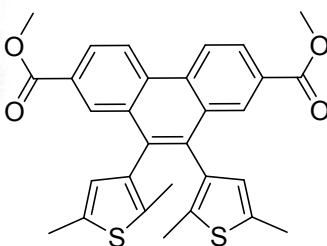

Fig. S22 Mass spectrum of dimethyl 9, 10-bis(2,5-dimethylthiophen-3-yl)phenanthrene-2,7-dicarboxylate(5)..

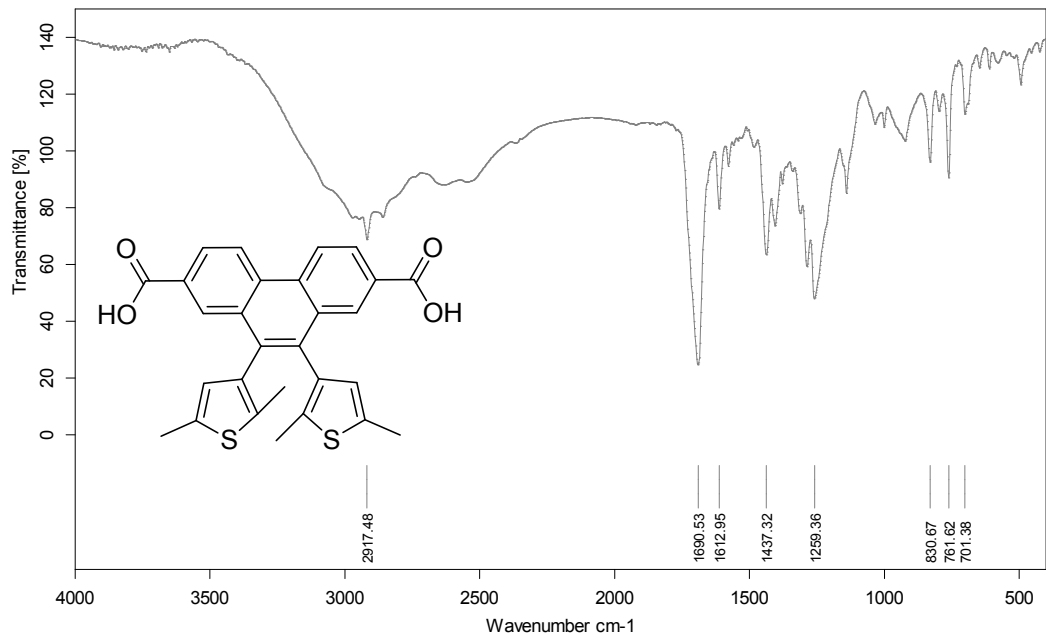

Fig. S23 IR spectrum of 9, 10-bis(2,5-dimethylthiophen-3-yl)phenanthrene-2,7-dicarboxylic acid(6).

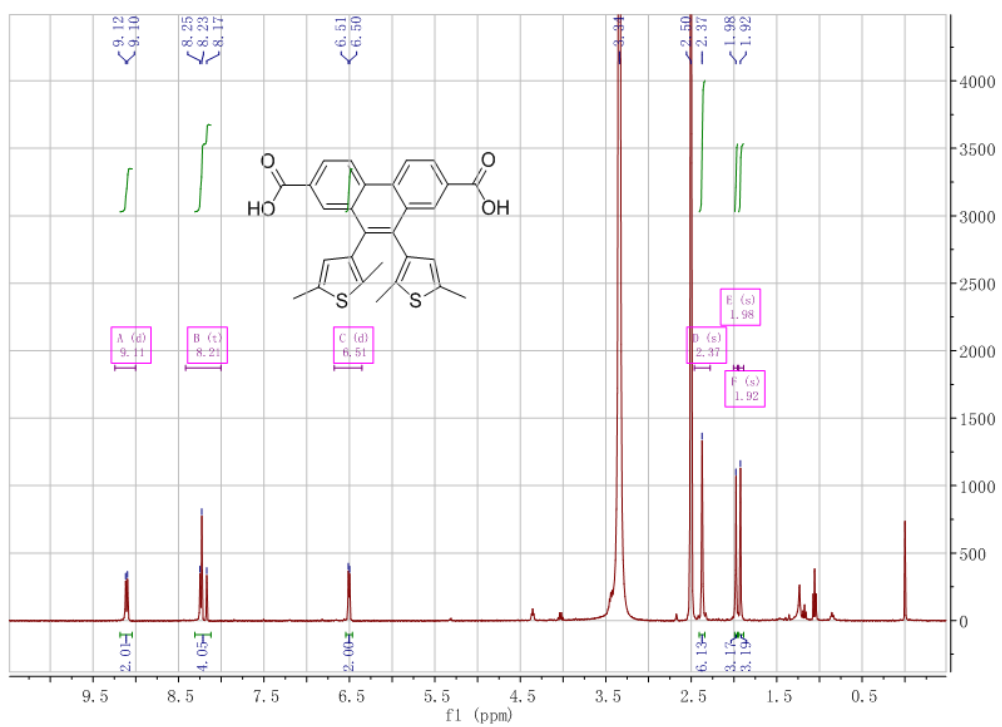

Fig. S24 <sup>1</sup>H NMR spectrum of 9, 10-bis(2,5-dimethylthiophen-3-yl)phenanthrene-2,7-dicarboxylic acid(6).

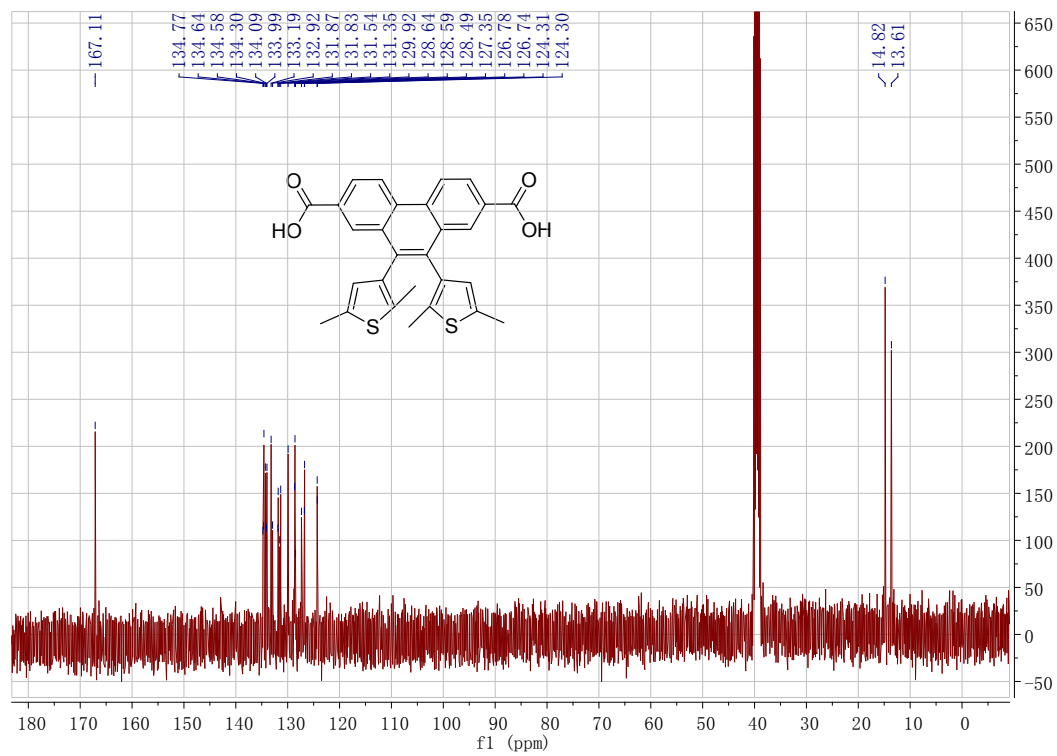

Fig. S25  $^{13}\text{C}$  NMR spectrum of 9, 10-bis(2,5-dimethylthiophen-3-yl)phenanthrene-2,7-dicarboxylic acid(6).

# Mass Spectrum List Report

## Analysis Info

Analysis Name D:\Data\11090501-2-11-09-15.d  
Method 11090901.M  
Sample Name 486  
Comment

Acquisition Date 9/15/2011 4:02:07 PM

Operator xxr  
Instrument HCTplus

## Acquisition Parameter

|                   |               |              |            |                          |         |
|-------------------|---------------|--------------|------------|--------------------------|---------|
| Ion Source Type   | ESI           | Ion Polarity | Positive   | Alternating Ion Polarity | on      |
| Mass Range Mode   | Ultra Scan    | Scan Begin   | 100 m/z    | Scan End                 | 800 m/z |
| Capillary Exit    | -120.2 Volt   | Skim 1       | -40.0 Volt | Trap Drive               | 67.3    |
| Accumulation Time | 58030 $\mu$ s | Averages     | 5 Spectra  | Auto MS/MS               | off     |

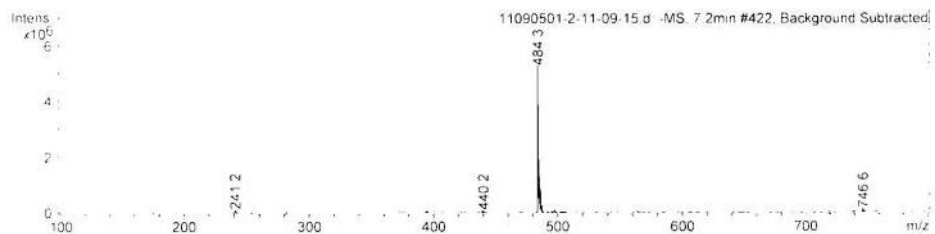

| #  | m/z   | I       | I%    |
|----|-------|---------|-------|
| 1  | 241.2 | 115617  | 2.2   |
| 2  | 439.2 | 72052   | 1.4   |
| 3  | 440.2 | 91756   | 1.7   |
| 4  | 484.3 | 5265583 | 100.0 |
| 5  | 485.2 | 1871755 | 35.5  |
| 6  | 486.3 | 850121  | 16.1  |
| 7  | 487.3 | 254777  | 4.8   |
| 8  | 497.4 | 110717  | 2.1   |
| 9  | 746.6 | 131679  | 2.5   |
| 10 | 747.8 | 67325   | 1.3   |

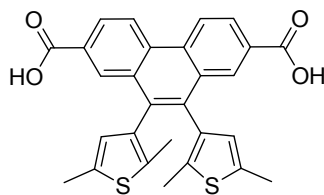

Fig. S26 Mass spectrum of 9,10-bis(2,5-dimethylthiophen-3-yl)phenanthrene-2,7-dicarboxylic acid(6).

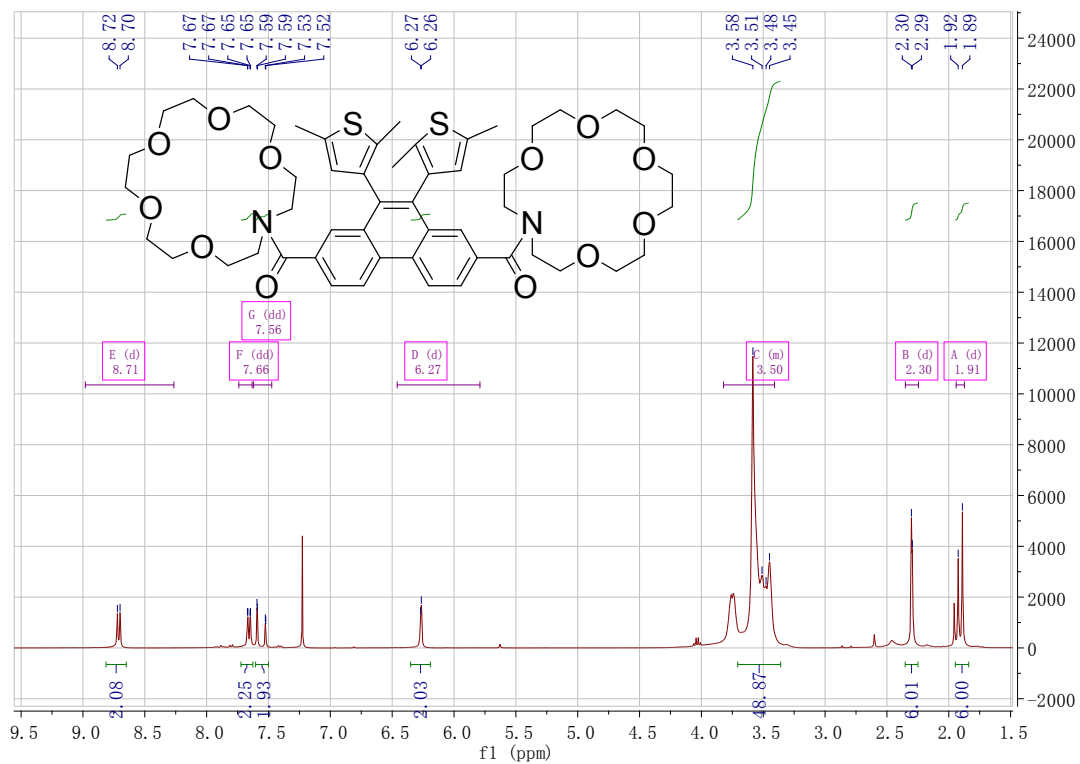

Fig. S 27 <sup>1</sup>H NMR spectrum of **PBC**

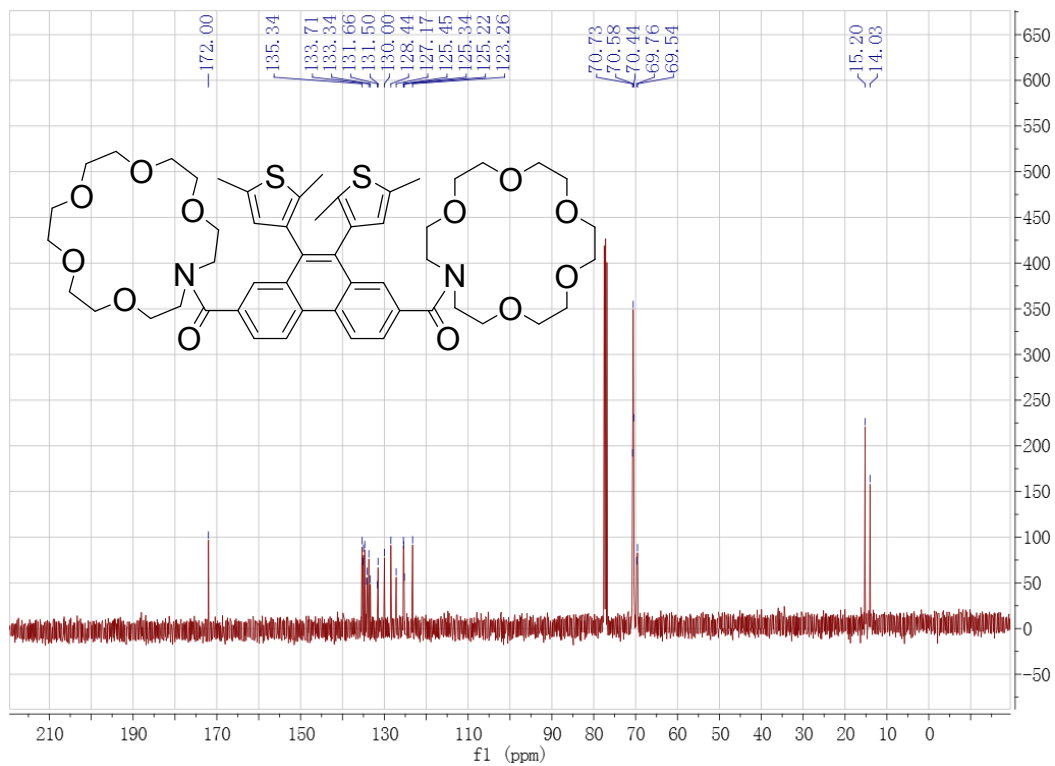

Fig. S 28 <sup>13</sup>C NMR spectrum of PBC

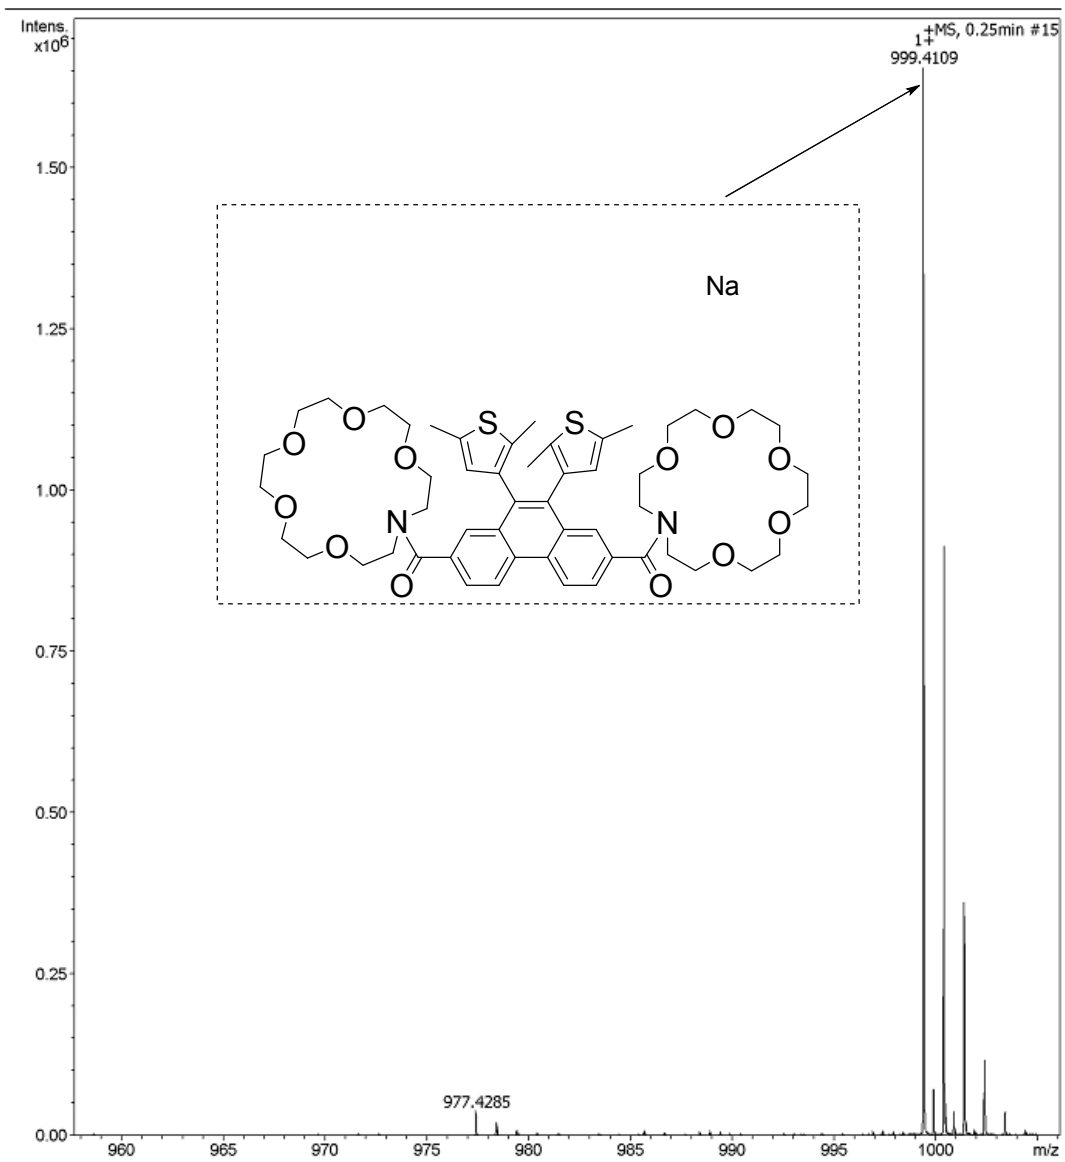

Fig. S 29 HRMS spectrum of **PBC**
